# Supplementary material for: Genetic variations in EIF2AK3 are associated with neurocognitive impairment in people living with HIV
Source: bioRxiv or medRxiv preprint supplement (doi:10.1101/2022.04.20.22273997), 2022-04-23
Supplement: Supplementary file [file media-5.pdf]

**Table S4.** Minor allele frequency of coding *EIF2AK3* SNVs

|                     | <b>Number of minor alleles</b> |          |          |
|---------------------|--------------------------------|----------|----------|
| <b>Allele</b>       | <b>0</b>                       | <b>1</b> | <b>2</b> |
| <b>rs13045, A</b>   | 58.8%                          | 34.5%    | 6.8%     |
| <b>rs867529, G</b>  | 69.1%                          | 26.1%    | 4.8%     |
| <b>rs1805165, G</b> | 69.1%                          | 26.1%    | 4.8%     |

SNV, single nucleotide variant
