# Supplementary material for: Genetic variations in EIF2AK3 are associated with neurocognitive impairment in people living with HIV
Source: bioRxiv or medRxiv preprint supplement (doi:10.1101/2022.04.20.22273997), 2022-04-23
Supplement: Supplementary file [file media-8.pdf]

**Table S7.** Global distribution of minor alleles of coding *EIF2AK3* SNVs

|           | <b>Overall cohort</b> | <b>European</b> | <b>Asian</b> | <b>Latin</b> | <b>Black</b> |
|-----------|-----------------------|-----------------|--------------|--------------|--------------|
| rs13045   | 33%                   | 33%             | 47%–51%      | 28%–39%      | 9%–15%       |
| rs867529  | 26%                   | 26%             | 39%–46%      | 21%–31%      | 1%–7%        |
| rs1805165 | 27%                   | 27%             | 41%–47%      | 21%–41%      | 1%–7%        |

SNV, single nucleotide variant
